# Supplementary material for: Aligned nickel-cobalt hydroxide nanorod arrays for electrochemical pseudocapacitor applications
Source: Royal Society of Chemistry journal article supplement (doi:10.1039/c2ra01220k), 2012-01-01
Supplement: c2ra01220k.pdf [file c2ra01220k.pdf]

## Supplementary Information For

# Aligned nickel-cobalt hydroxide nanorod arrays for electrochemical pseudocapacitor applications

Rahul R. Salunkhe, Kihun Jang, Sung-won Lee, Heejoon Ahn\*

*Department of Organic and Nano Engineering and Institute of Nano Science and Technology,*

*Hanyang University, Seoul 133-791, South Korea.*

E-mail: [ahn@hanyang.ac.kr](mailto:ahn@hanyang.ac.kr)

The data include Figures S1, S2, S3, S4 and Table S1.

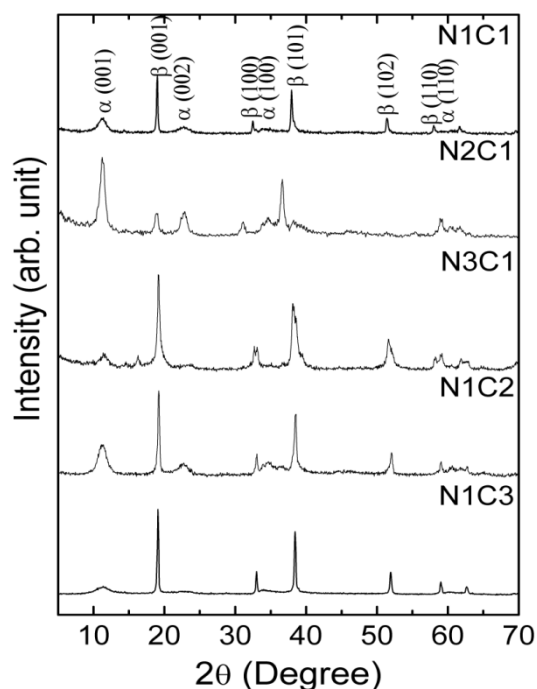

**Figure S1.** XRD patterns of nickel-cobalt binary hydroxides prepared using the CBD method at 70°C with different Ni-Co composition ratios (N-nickel, C-cobalt).

The X-ray diffraction peaks for various compositions of nickel and cobalt hydroxide are shown in the figure. The peaks contain contributions from both nickel hydroxide ( $\alpha$  and  $\beta$ ) and cobalt hydroxide ( $\alpha$  and  $\beta$ ). Since the peak position of these two are very close to each other, it is difficult to distinguish between them.<sup>1,2</sup> The obtained peaks were compared with standard peak positions (JCPDs data cards: 30-0443, 14-0117 for  $\beta$ -peak of cobalt and nickel

hydroxide, respectively.) Whereas,  $\alpha$ -peak positions were confirmed by comparing the results with previously reported data.<sup>1</sup>

1. V. Gupta, S. Gupta and N. Miura, *J. Power Sources* 2008, 175, 680.
2. Y. Liang, S. Bao and H. Li, *J. Solid State Electrochem.* 2007, 11, 571.

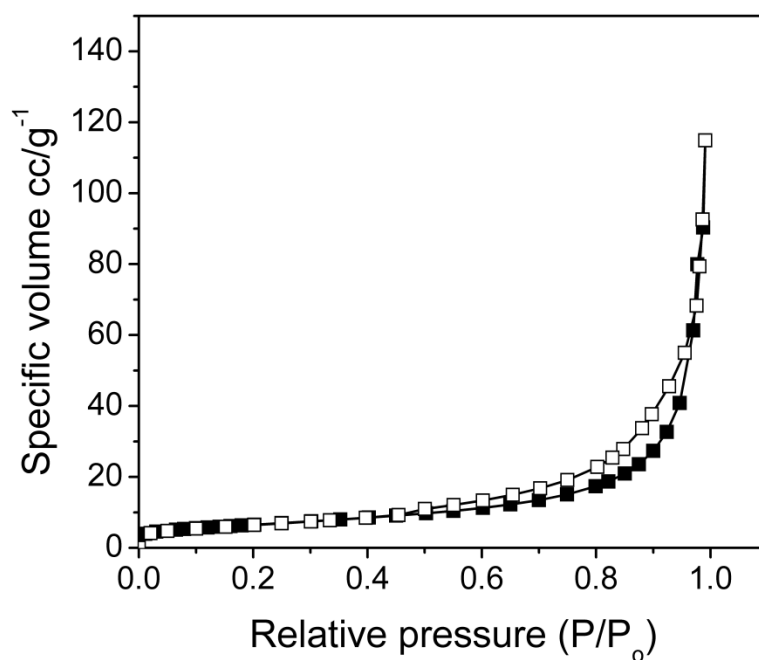

**Figure S2.** Nitrogen adsorption/desorption isotherms of the Ni-Co hydroxide nanorods.

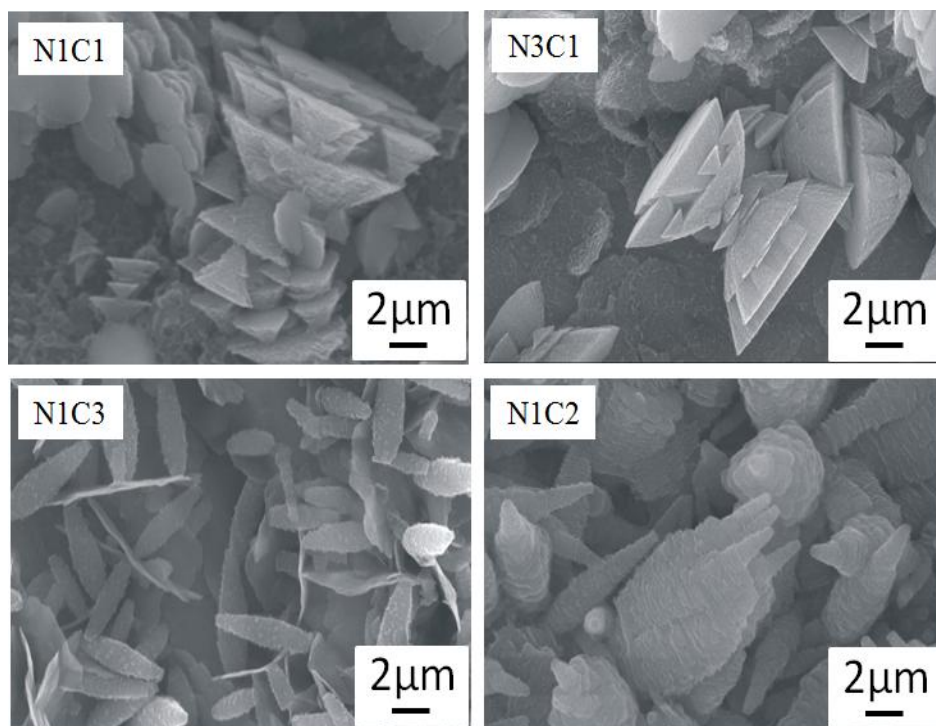

**Figure S3.** FESEM images of nickel-cobalt hydroxide at different compositions of nickel and cobalt (N1C1, N3C1, N1C3 and N1C2).

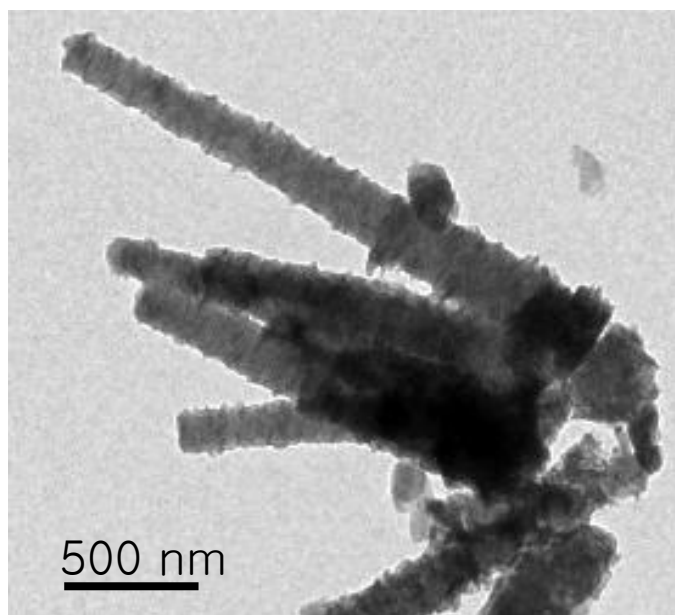

**Figure S4.** Bright field TEM image of nickel-cobalt hydroxide nanorods (N2C1 sample).

**Table S1.** Energy dispersive X-ray (EDX) analysis of nickel and cobalt at various compositions of cobalt chloride and nickel nitrate.

| (Nickel : Cobalt)<br>ratio | Nickel (Atomic %) | Cobalt (Atomic %) |
|----------------------------|-------------------|-------------------|
| N1C3                       | 23.56             | 76.44             |
| N1C2                       | 30.20             | 69.80             |
| N1C1                       | 44.44             | 55.56             |
| N2C1                       | 68.66             | 31.34             |
| N3C1                       | 78.80             | 21.20             |
